# Supplementary material for: Multicolor light emitters based on energy exchange between Tb and Eu ions co-doped into ultrasmall β-NaYF4 nanocrystals
Source: Royal Society of Chemistry journal article supplement (doi:10.1039/c2jm15785c), 2012-01-01
Supplement: c2jm15785c.pdf [file c2jm15785c.pdf]

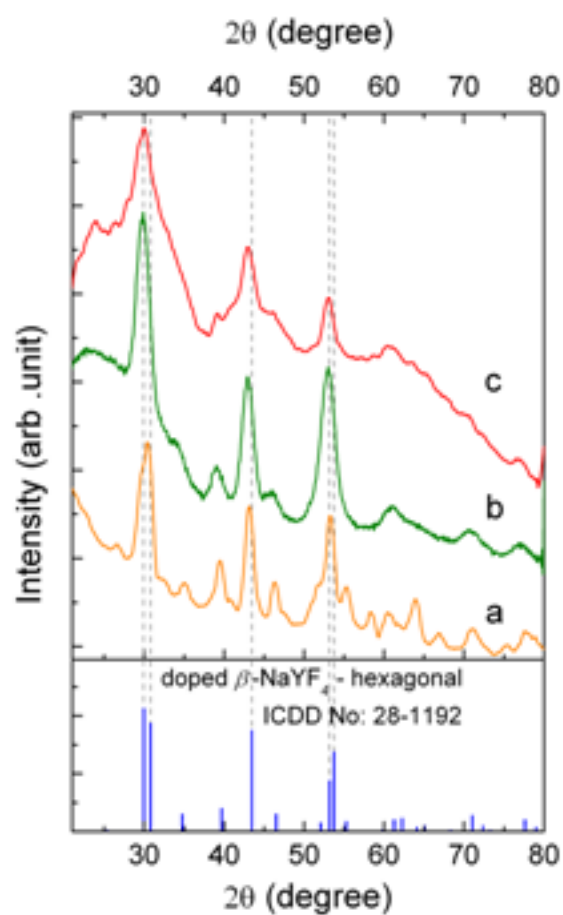

**Figure 1.** p-XRD patterns of (a)  $\beta$ -NaYF<sub>4</sub>:Tb,Eu, (b)  $\beta$ -NaYF<sub>4</sub>:Tb and (c)  $\beta$ -NaYF<sub>4</sub>:Tb,Eu nanocrystals together with the reference data.

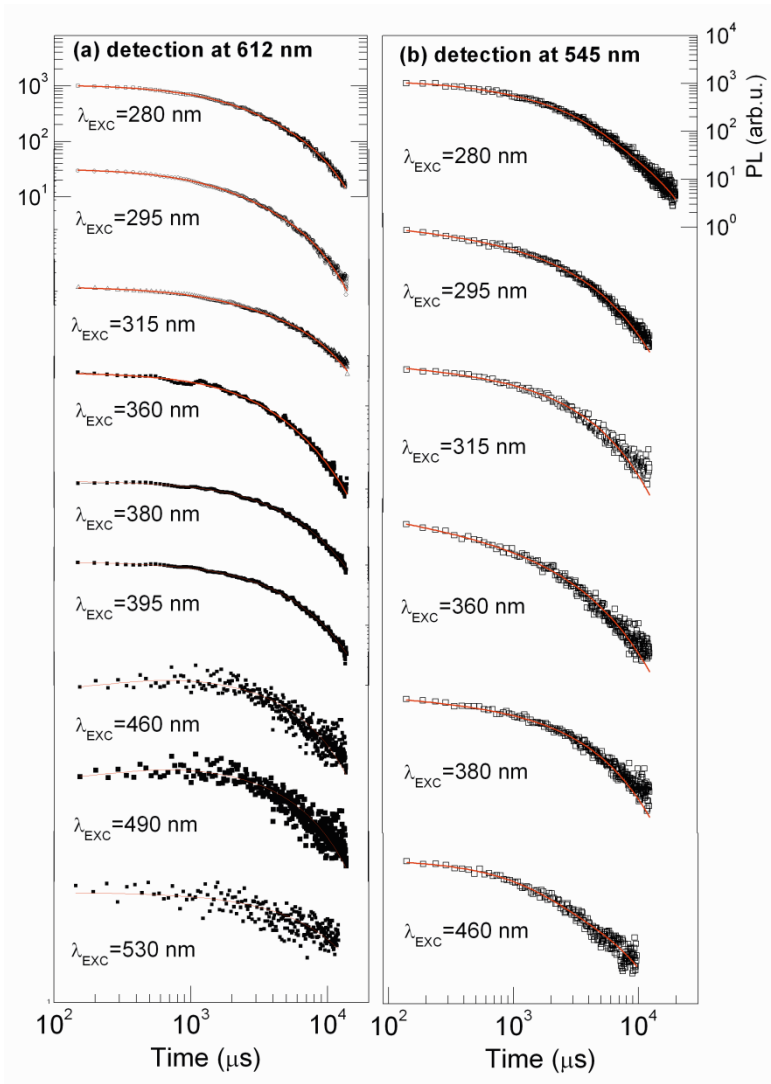

**Figure 2.** Emission decay time measurements for  $\beta$ -NaYF<sub>4</sub>:Tb,Eu recorded at different excitation wavelengths together with the fitting curves.
